# Supplementary material for: Sequential Processing Enables 17% All-Polymer Solar Cells via Non-Halogen Organic Solvent
Source: MDPI journal article supplement (doi:10.3390/molecules27175739), 2022-09-05
Supplement: s1 [file s1]

Supporting Information

# Sequential Processing Enables 17% All-Polymer Solar Cells via Non-Halogen Organic Solvent

Chaoyue Zhao <sup>1†</sup>, Lihong Wang <sup>1†</sup>, Guoping Zhang <sup>1</sup>, Yajie Wang <sup>1</sup>, Ruiyu Hu <sup>1</sup>, Hui Huang <sup>1</sup>, Mingxia Qiu <sup>1</sup>, Shunpu Li <sup>1</sup> and Guangye Zhang <sup>1\*</sup>

<sup>1</sup> College of New Materials and New Energies, Shenzhen Technology University, Shenzhen 518118, China

\* Correspondence: zhangguangye@sztu.edu.cn

† These authors contributed equally to this work

## Device characterization.

The current density-voltage (*J-V*) curves of all encapsulated devices were measured using a Keithley 2400 Source Meter under AM 1.5G (100 mW cm<sup>-2</sup>) using an Enlitech solar simulator. The light intensity was calibrated using a standard Si diode with KG5 filter to bring spectral mismatch to unity. Optical microscope (Olympus BX51) was used to define the device area (8.5 mm<sup>2</sup>). EQEs were measured using an Enlitech QE-S EQE system equipped with a standard Si diode. Monochromatic light was generated from a Enlitech 300W lamp source.

**Table S1.** EQE and  $n_{id,d}$  of BC and SqP.

| active layer | $J_{EQE}$<br>[mA/cm <sup>2</sup> ] | $n_{id,d}$ <sup>a)</sup> |
|--------------|------------------------------------|--------------------------|
| BC           | 23.12                              | 1.32                     |
| SqP          | 23.36                              | 1.33                     |

<sup>a)</sup> Ideality factors obtained from fitting dark *J-V* curves.

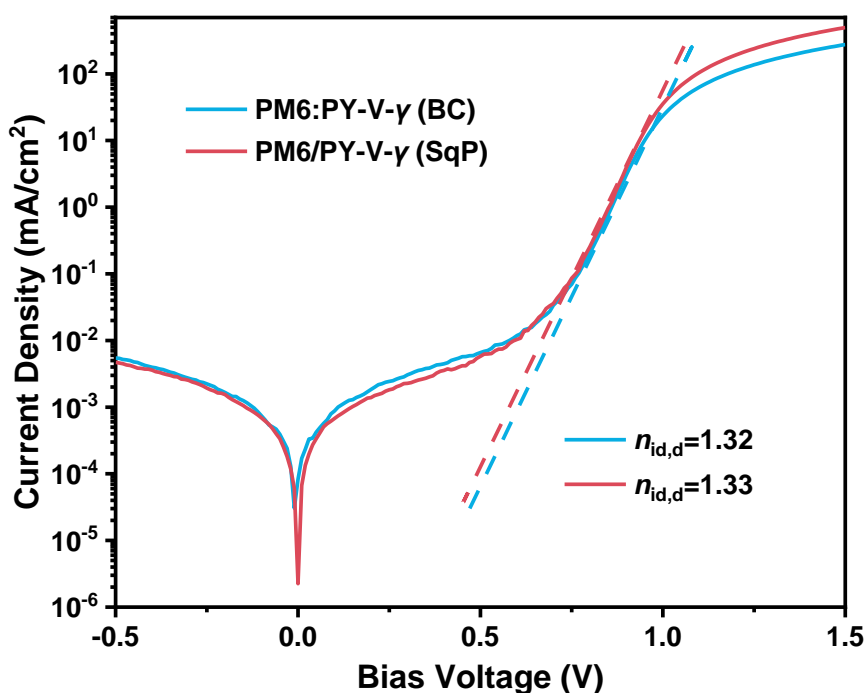

**Figure S1.** dark *J-V* curves of BC and SqP.

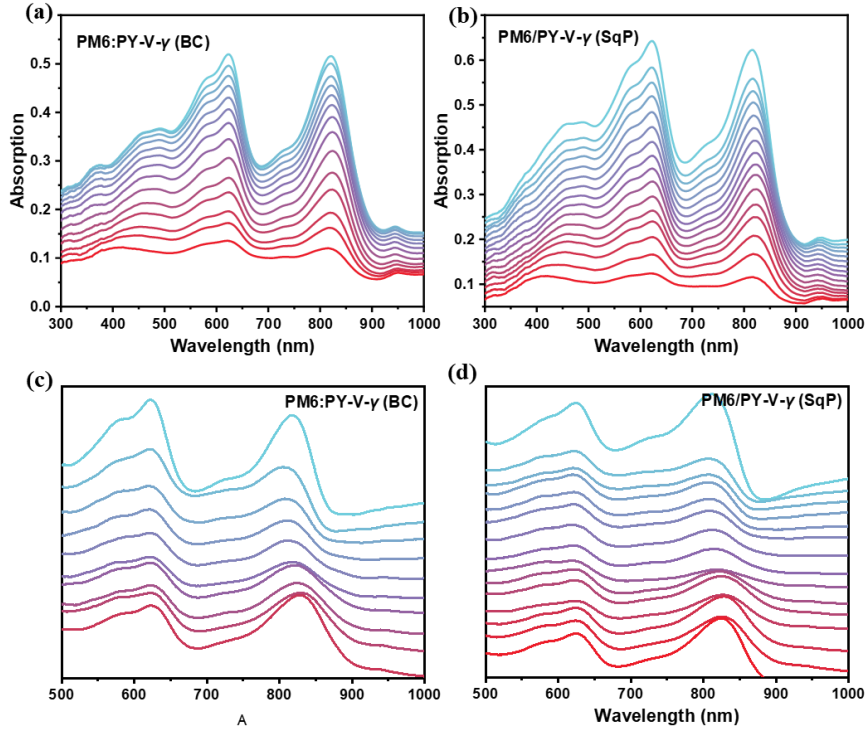

**Figure S2.** a) and b) Film-depth-dependent light absorption spectra, c)-d) absorption of the sub-layer inside the active layer calculated from FLAS spectra. The spectra are vertically shifted and rescaled for clarity.

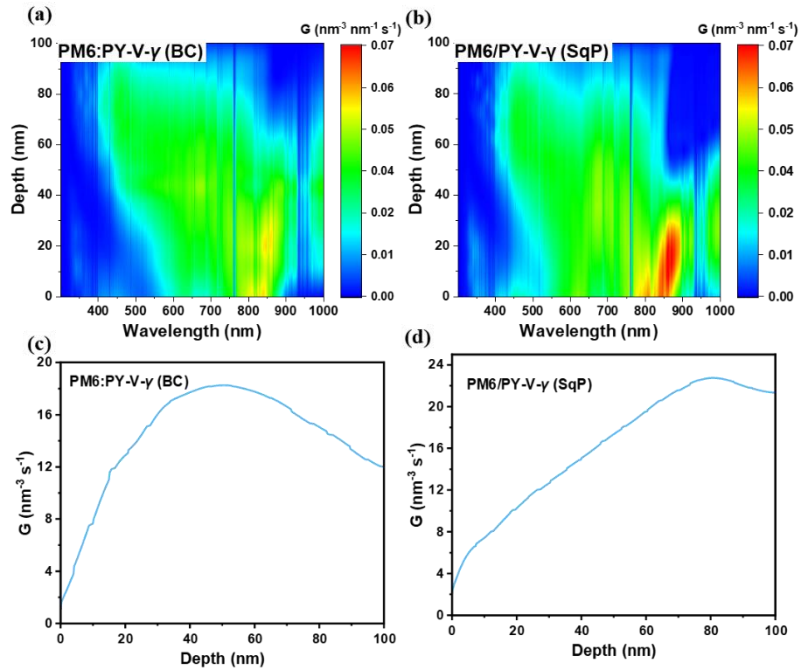

**Figure S3.** a-b) Integrated generation rate in the vertical direction of the film; c)-d) Exciton generation map across the vertical direction of the active layer film as a function of wavelength.

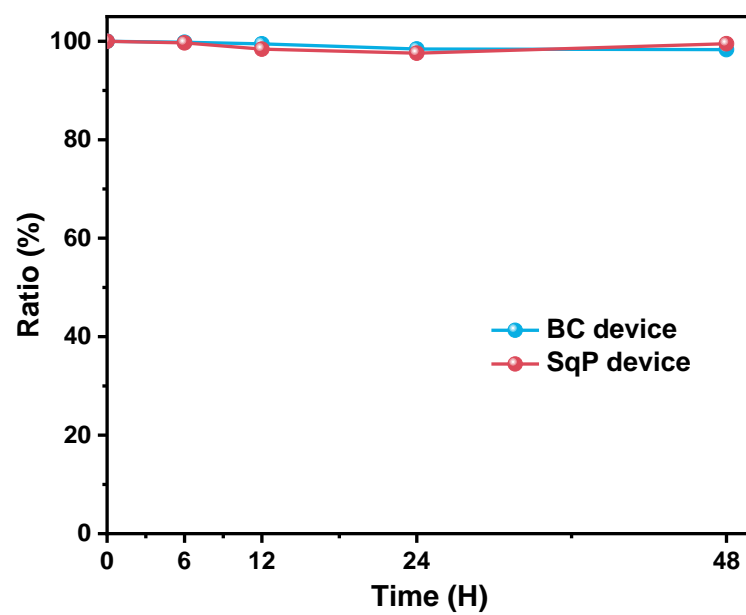

**Figure S4.** The stability of BC and SqP device.

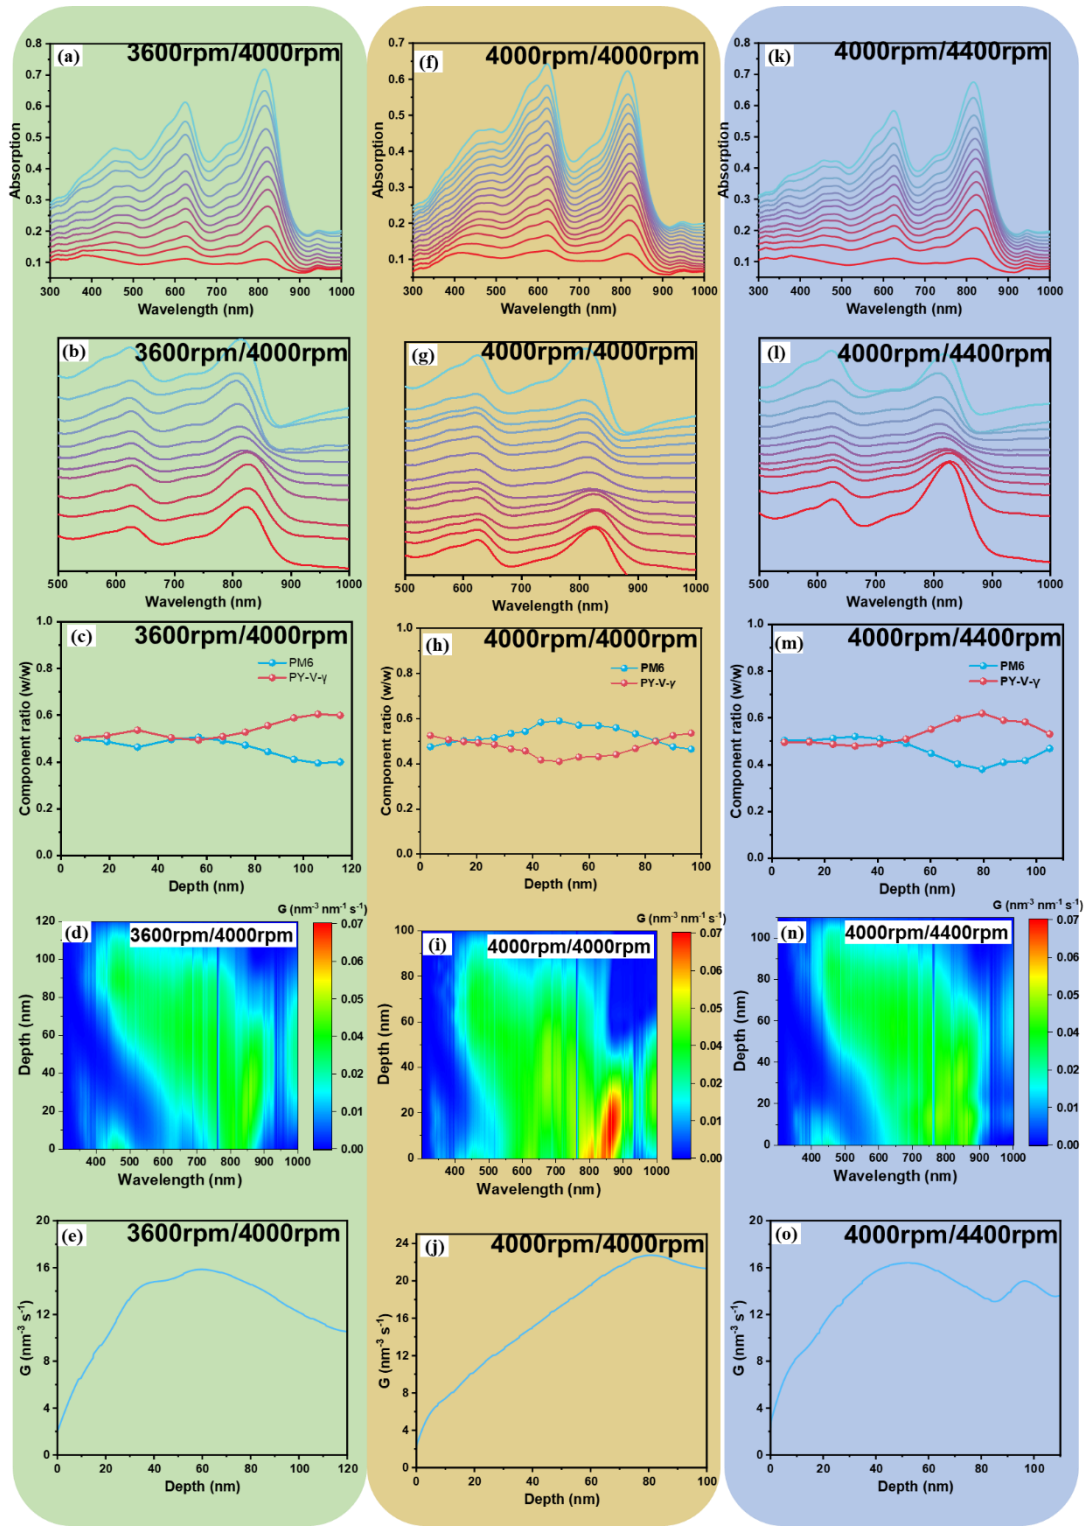

**Figure S5.** Comparison of FLAS tests with different spin speeds to obtain different active layer thicknesses, based on SqP devices: (a, f, k) Film-depth-dependent light absorption spectra; (b, g, l) absorption of the sub-layer inside the active layer calculated from FLAS spectra; The spectra are vertically shifted and rescaled for clarity; (c, h, m) The composition ratio across the vertical direction of the active layer; (d, i, n) Integrated generation rate in the vertical direction of the film; (e, j, o) Exciton generation map across the vertical direction of the active layer film as a function of wavelength.
